# Supplementary material for: High levels of sewage contamination released from urban areas after storm events: A quantitative survey with sewage specific bacterial indicators
Source: PLOS journal article supplement (doi:10.1371/journal.pmed.1002614), 2018-07-24

**S5 Fig.** Streamflow (upper panel) and corresponding HB, Lachno2, E. coli, and enterococci indicator concentrations (lower panel) measured during rain event and low-flow periods in the MKE River in Milwaukee, Wisconsin in 2014 and 2015. Each letter (A–N) represents a different sampling period. Vertical black dashed lines represent the beginning and ending dates and times that were defined for each event or low-flow period. HB, human Bacteroides; Lachno2, human Lachnospiraceae; MKE, Milwaukee

**A**

# Milwaukee Area Streamflow and Indicator Bacteria Concentrations at the Milwaukee River

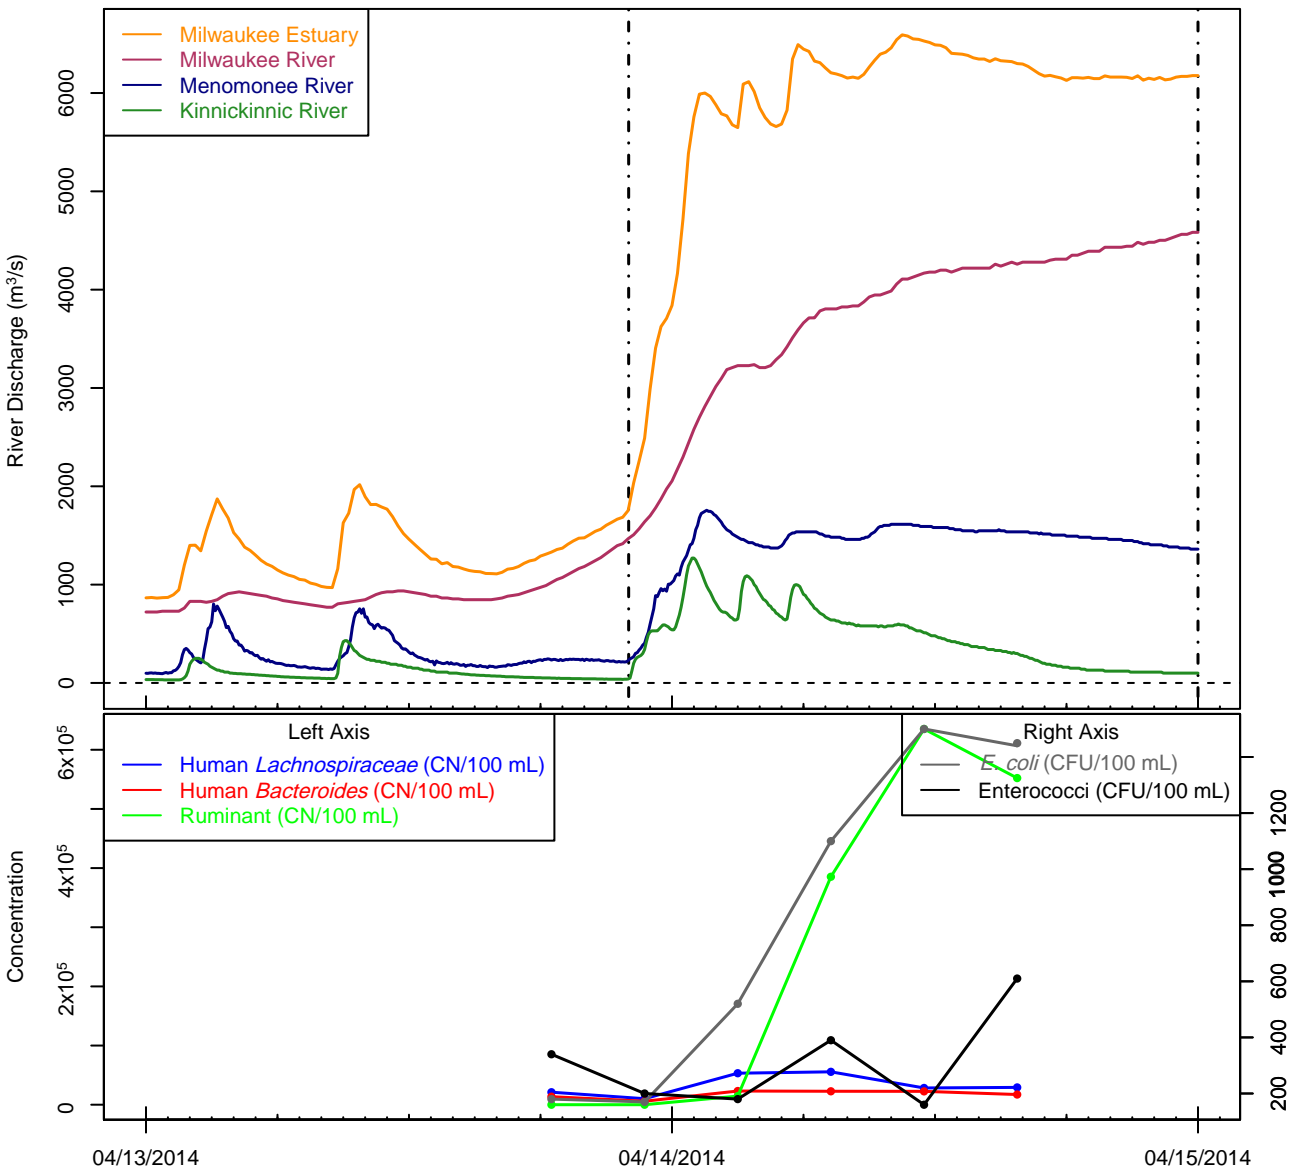

**B**

# Milwaukee Area Streamflow and Indicator Bacteria Concentrations at the Milwaukee River

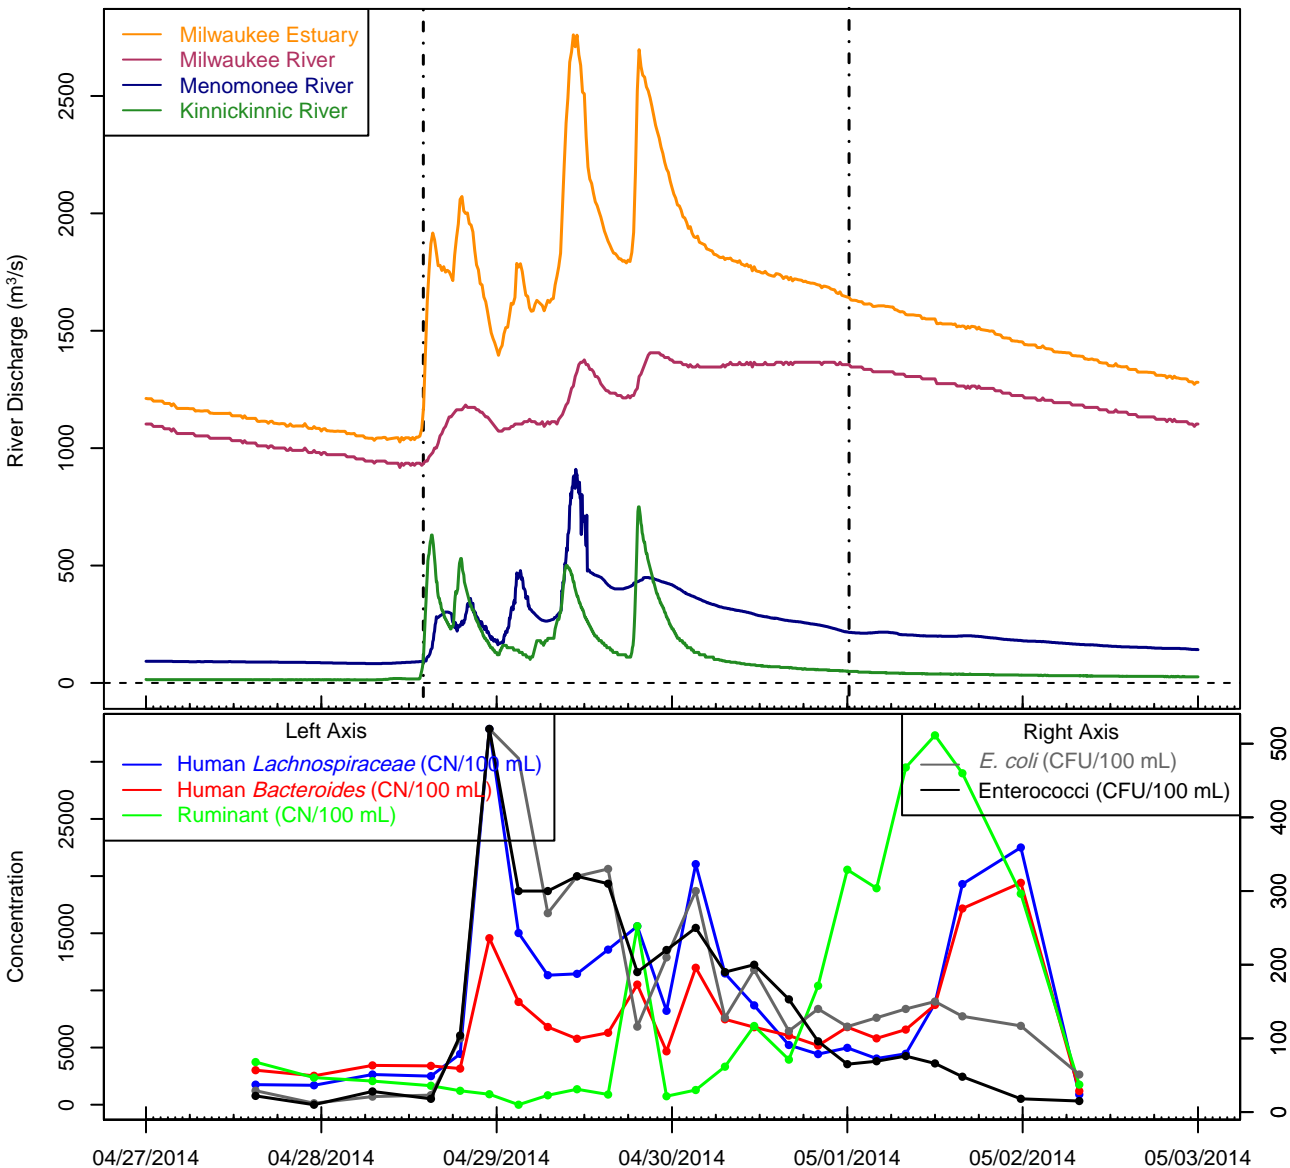

**C**

# Milwaukee Area Streamflow and Indicator Bacteria Concentrations at the Milwaukee River

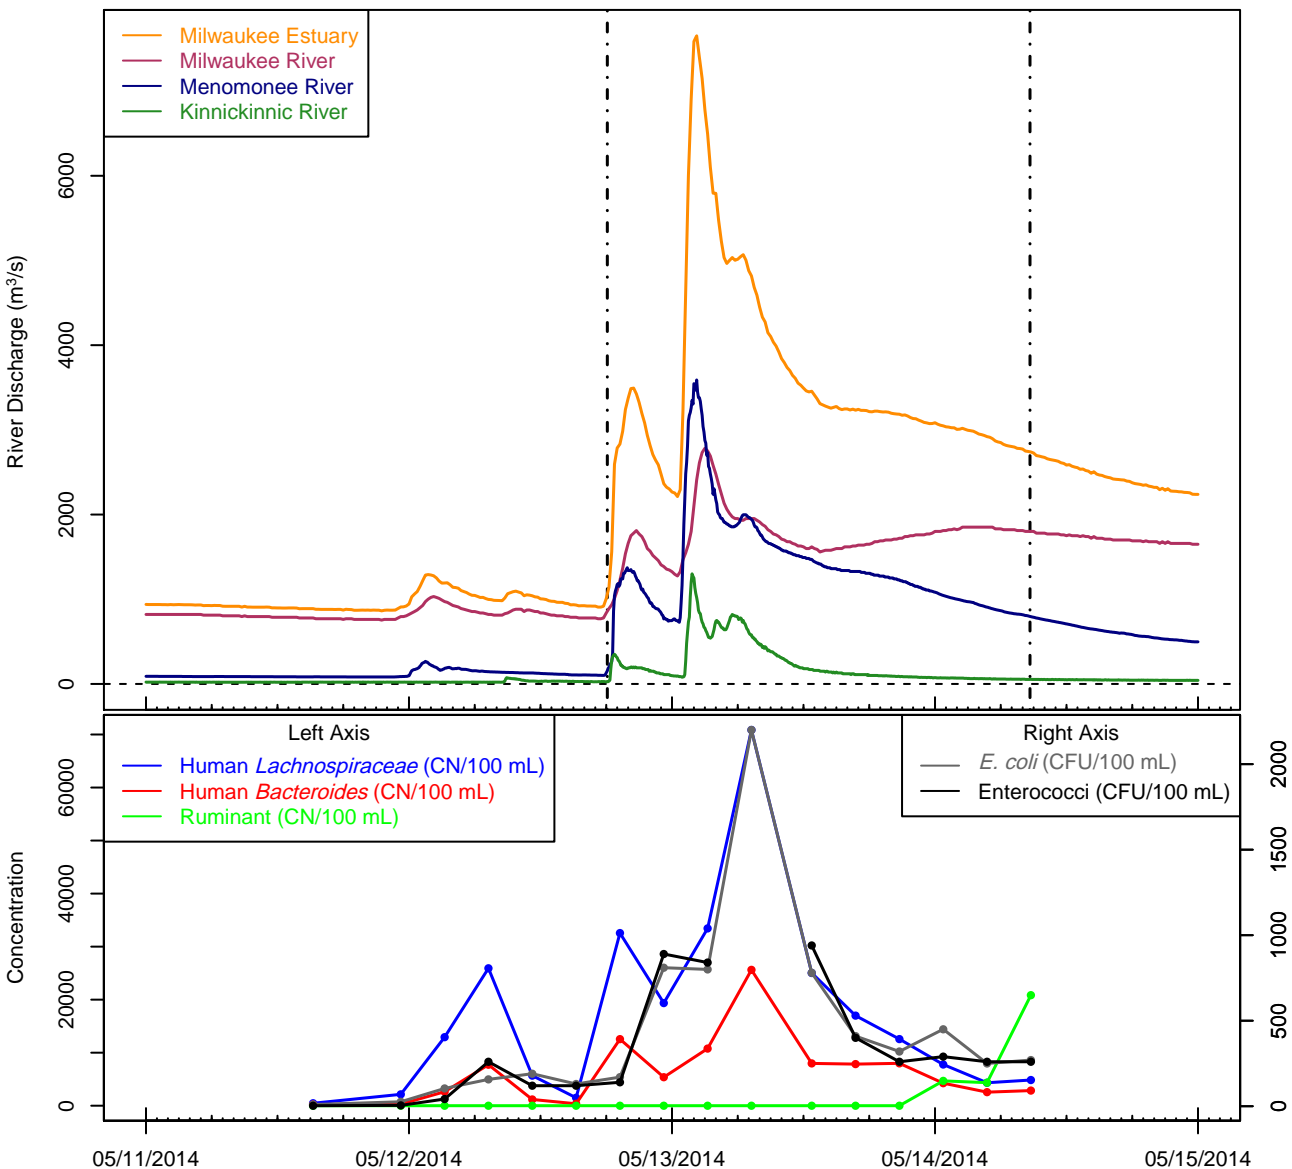

**D**

# Milwaukee Area Streamflow and Indicator Bacteria Concentrations at the Milwaukee River

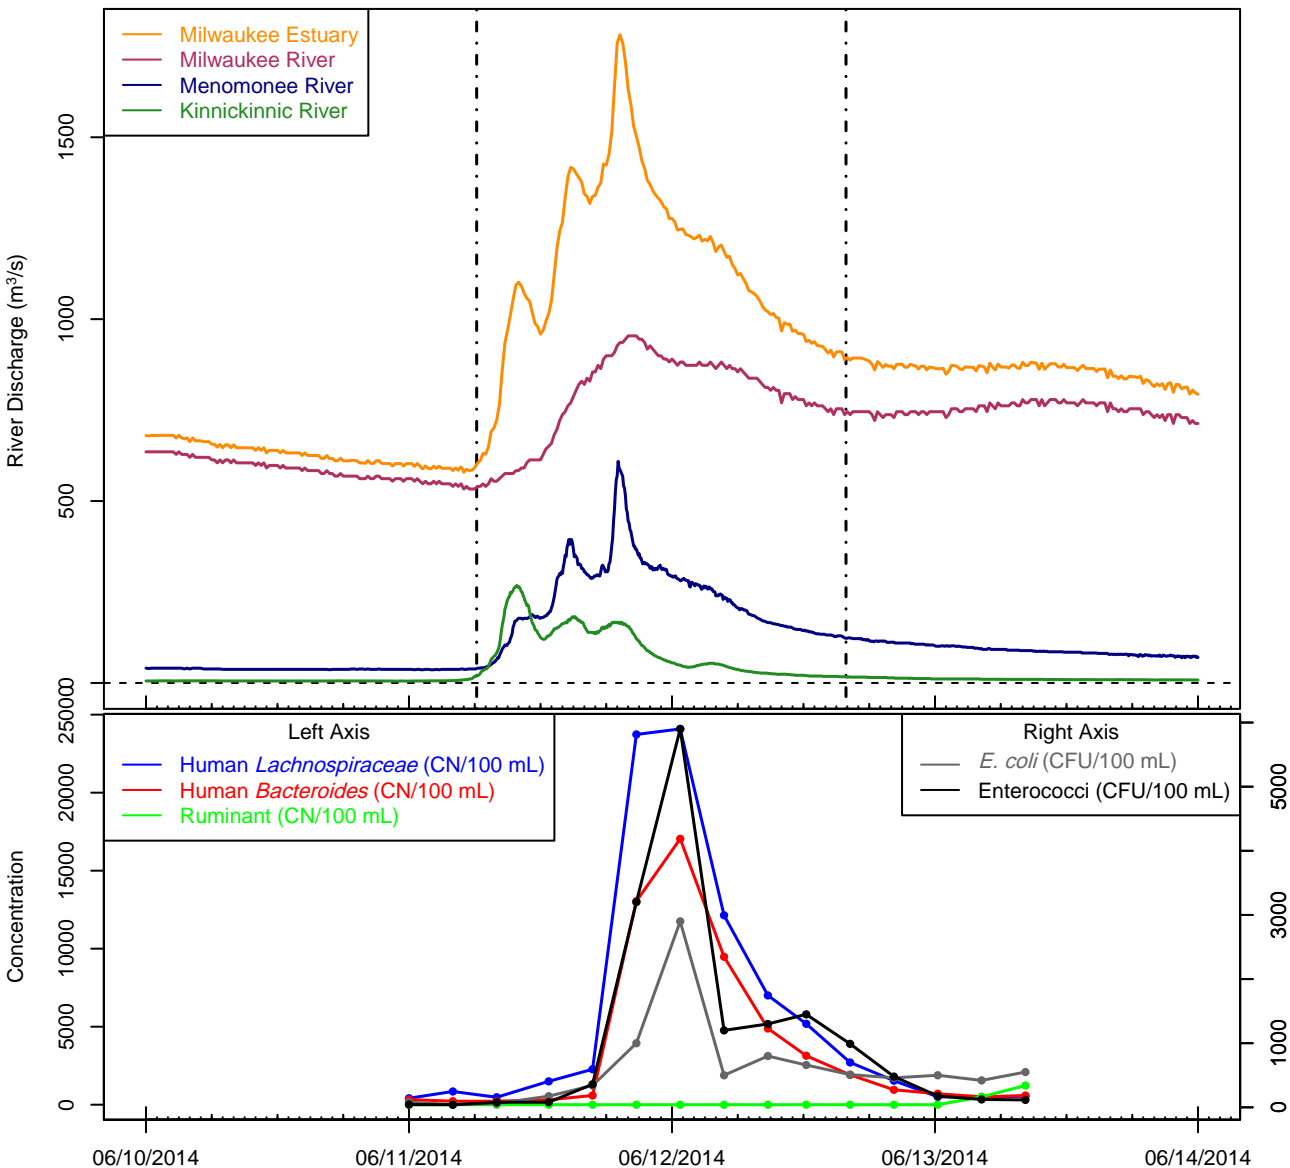

E

# Milwaukee Area Streamflow and Indicator Bacteria Concentrations at the Milwaukee River

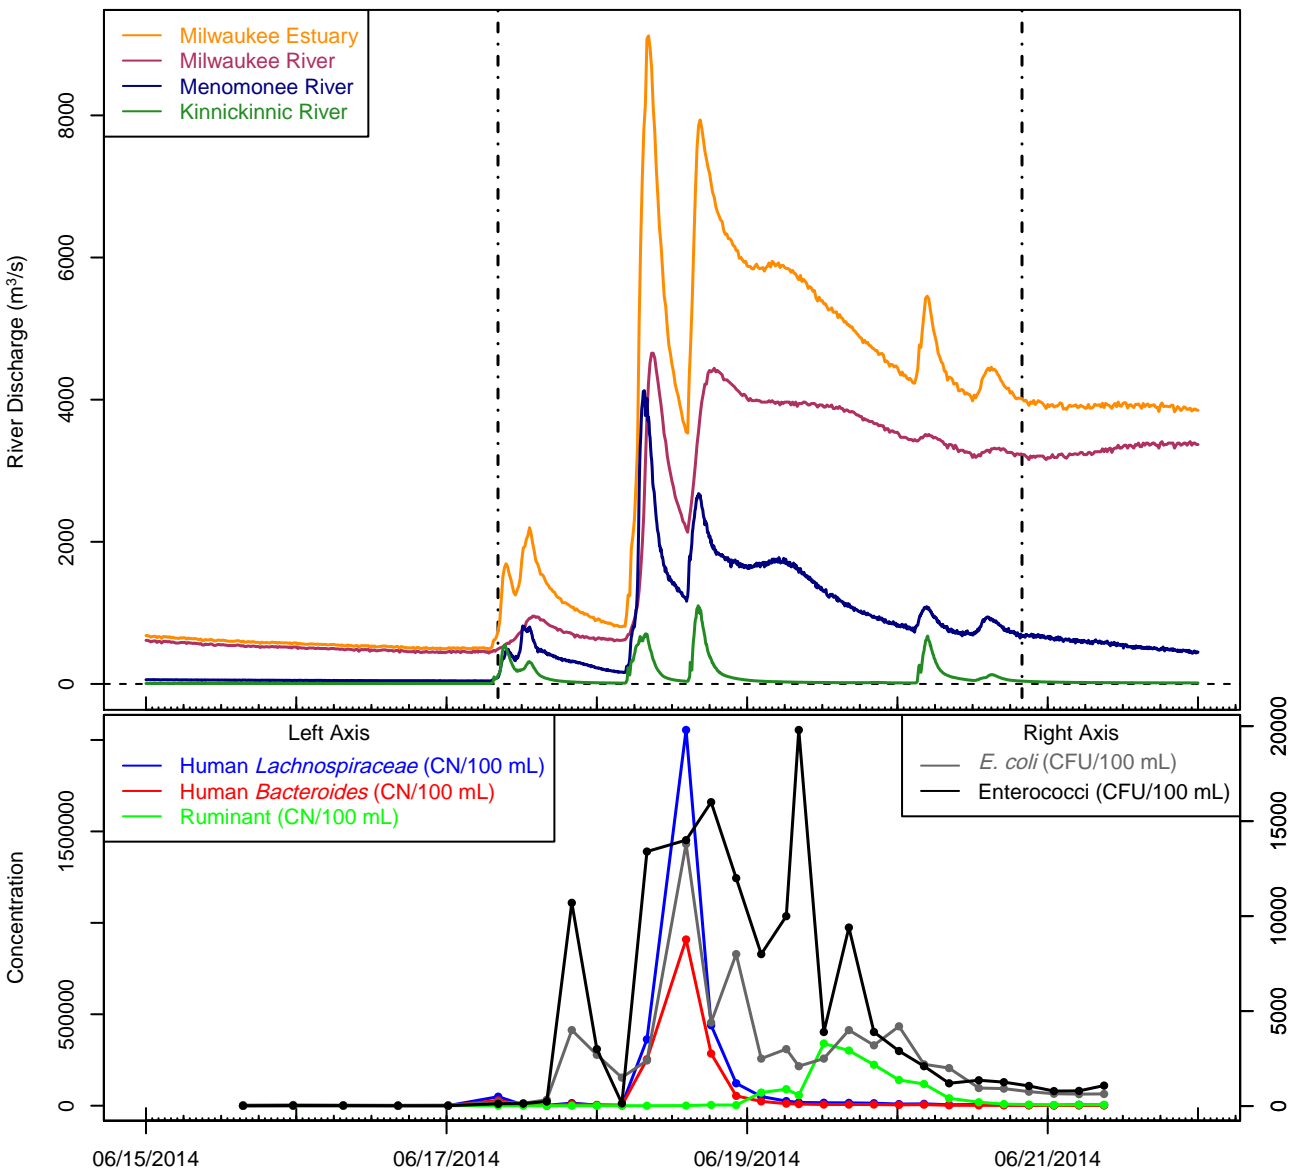

**F**

# Milwaukee Area Streamflow and Indicator Bacteria Concentrations at the Milwaukee River

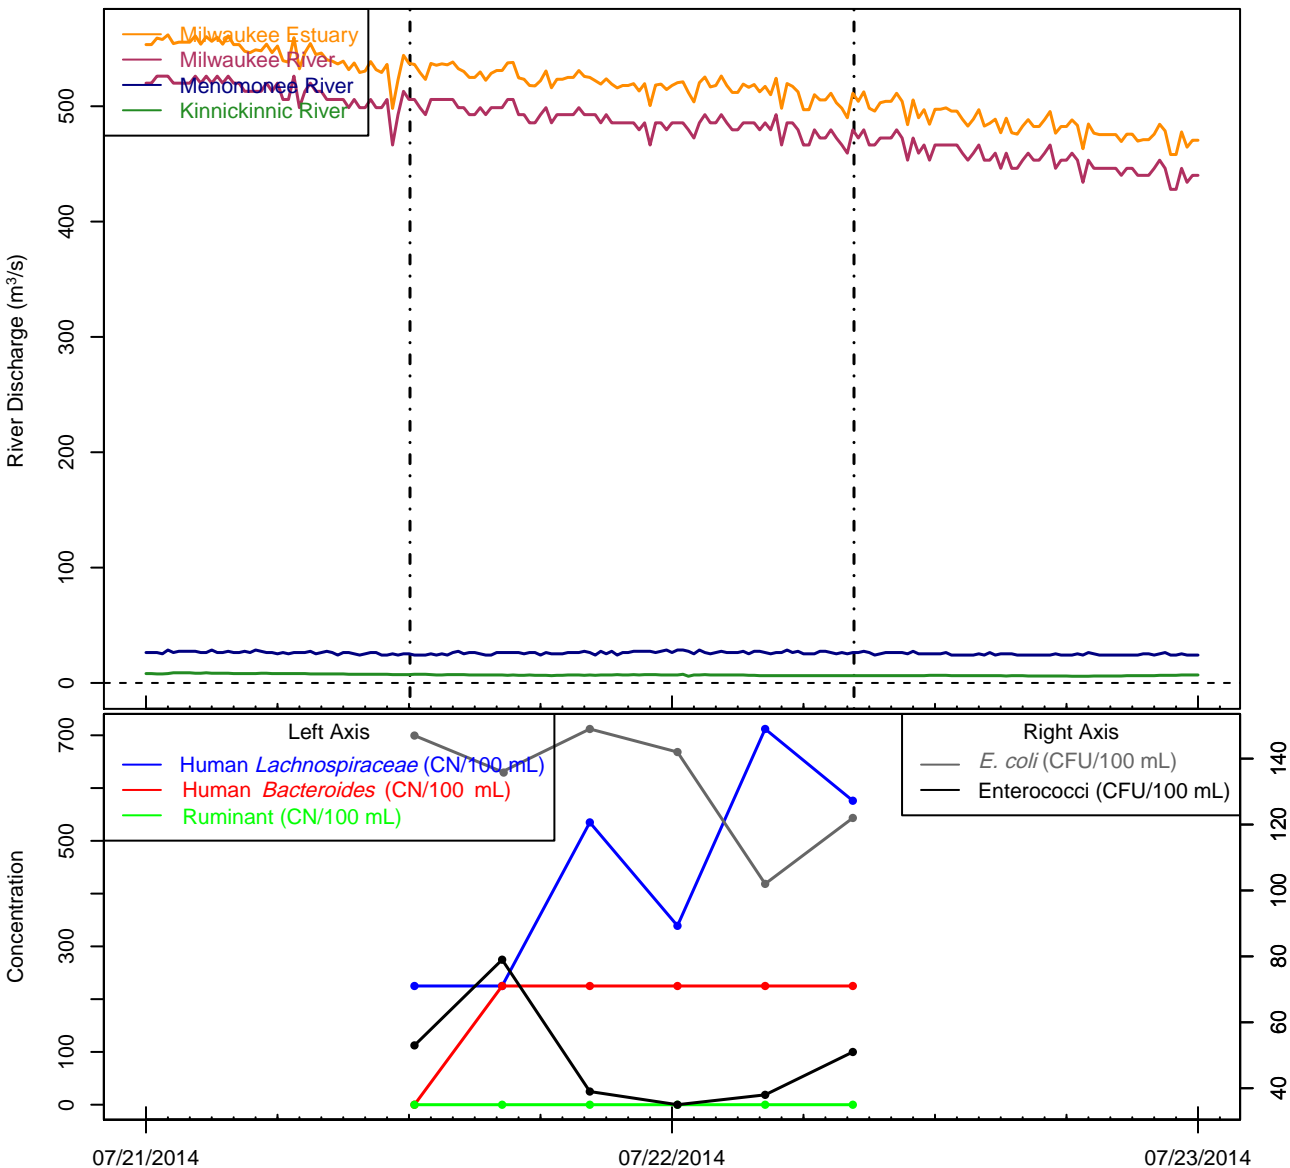

**G**

# Milwaukee Area Streamflow and Indicator Bacteria Concentrations at the Milwaukee River

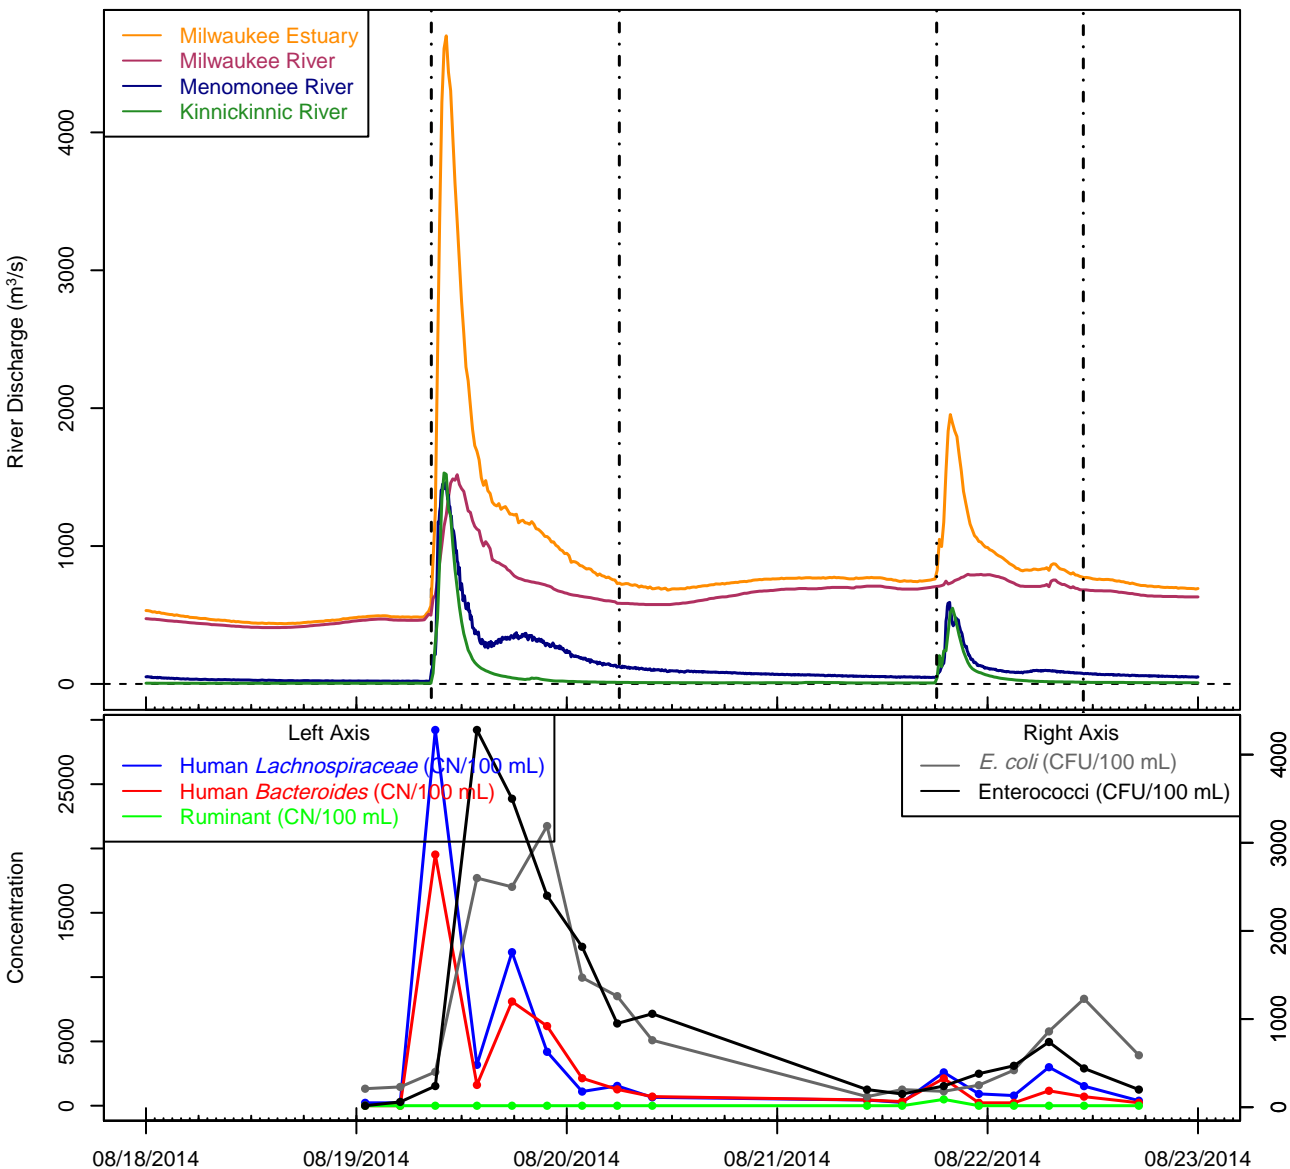

H

# Milwaukee Area Streamflow and Indicator Bacteria Concentrations at the Milwaukee River

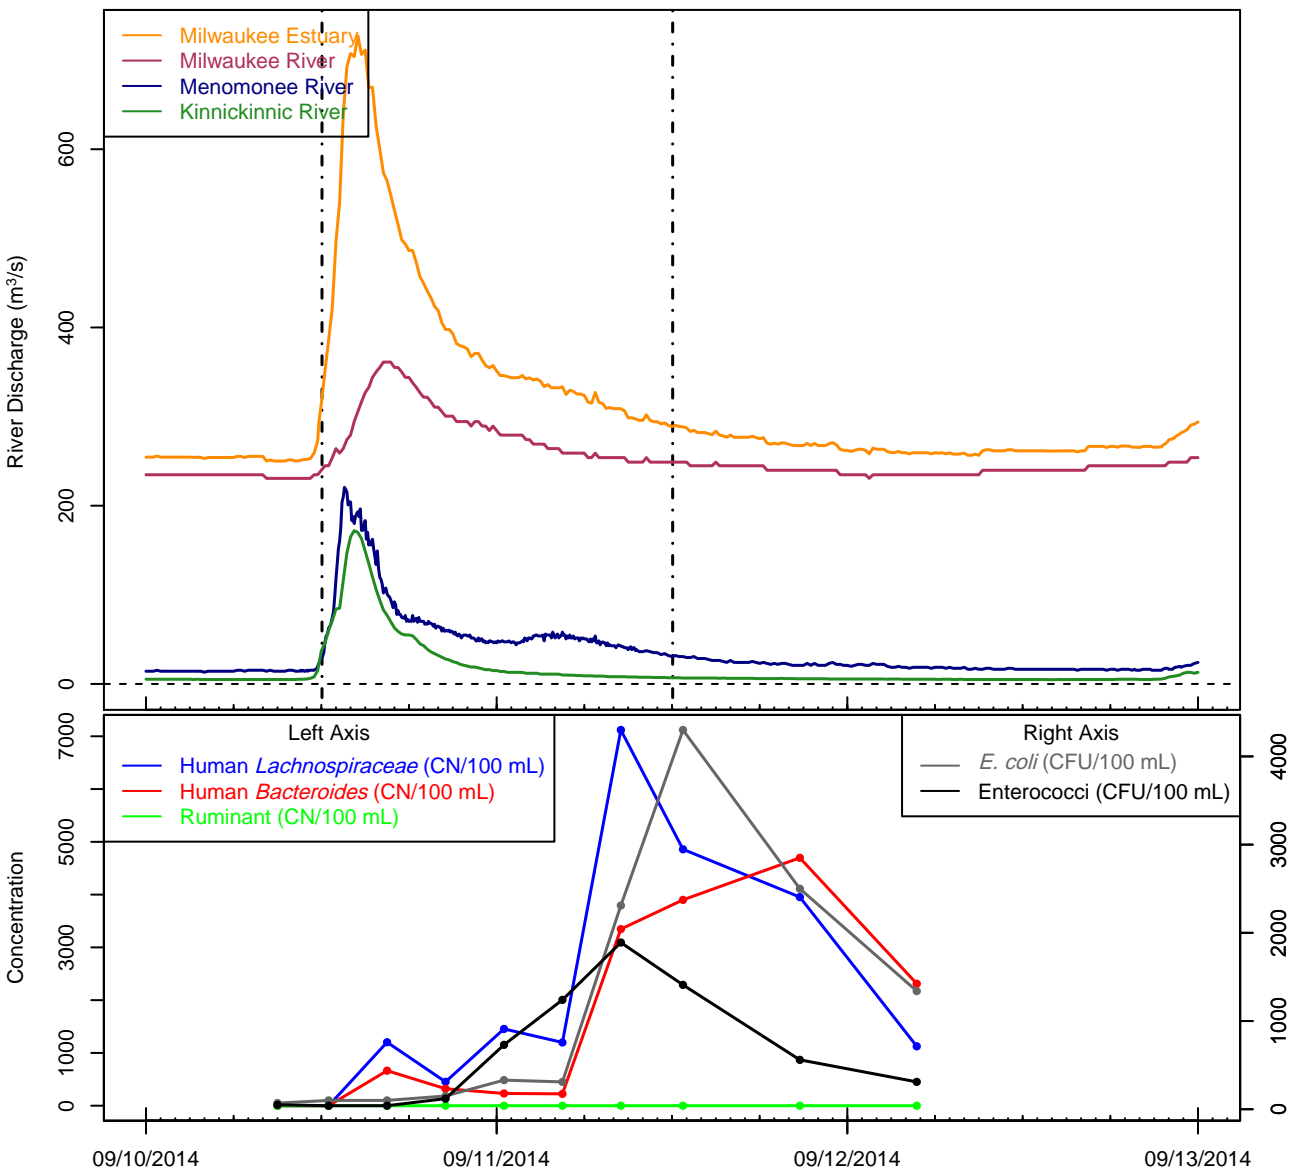

# Milwaukee Area Streamflow and Indicator Bacteria Concentrations at the Milwaukee River

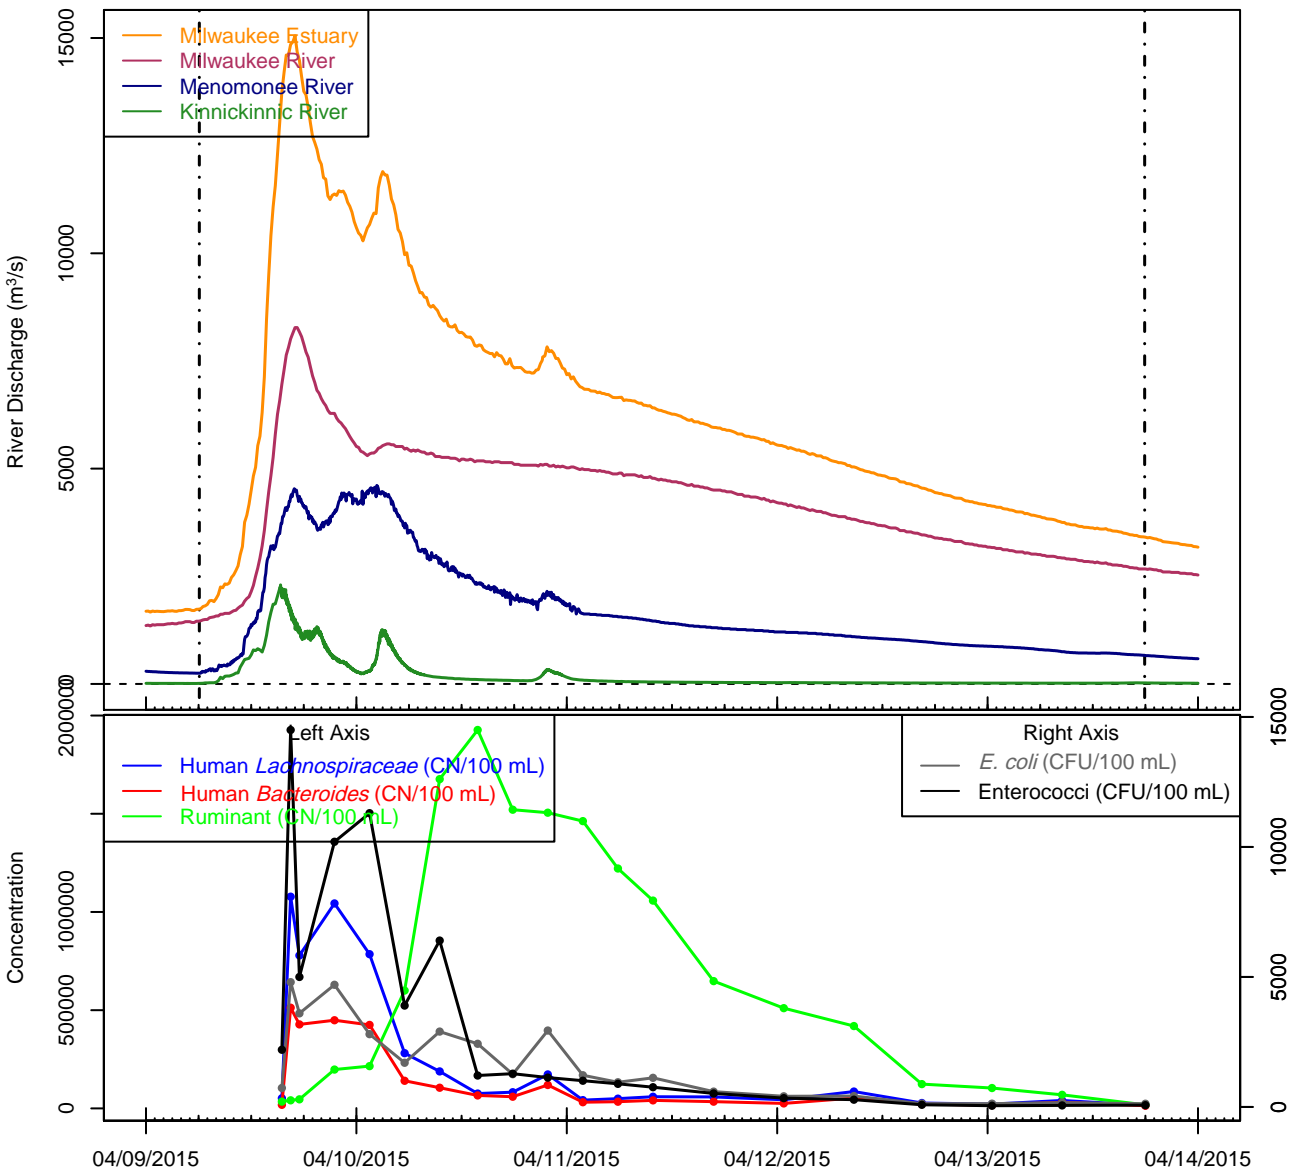

J

# Milwaukee Area Streamflow and Indicator Bacteria Concentrations at the Milwaukee River

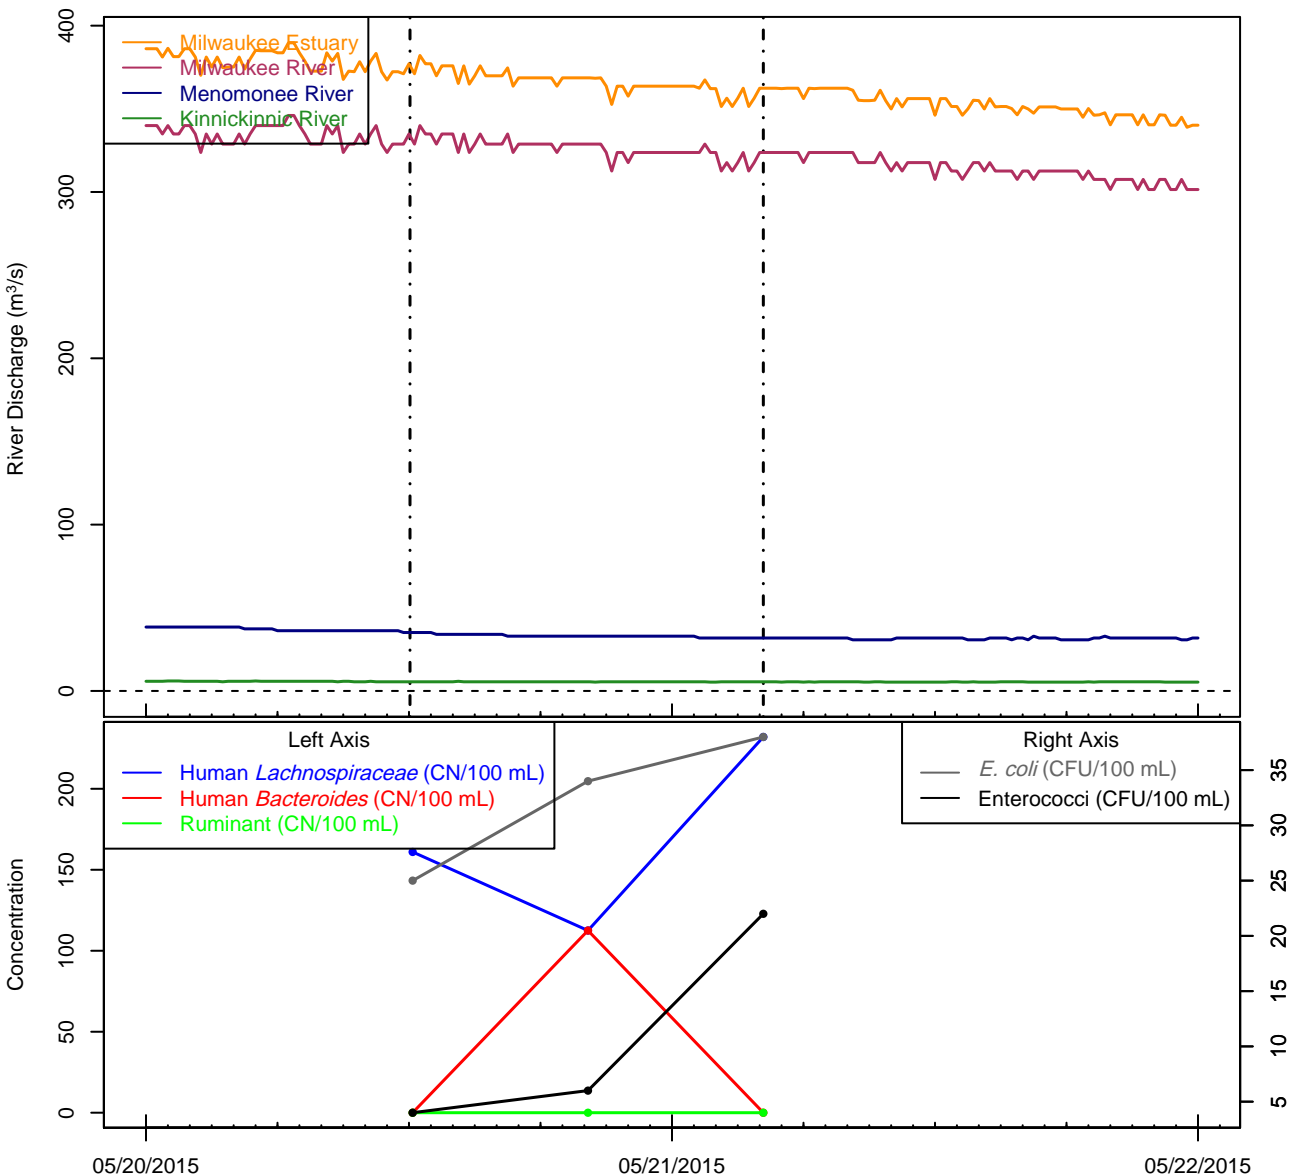

**K**

# Milwaukee Area Streamflow and Indicator Bacteria Concentrations at the Milwaukee River

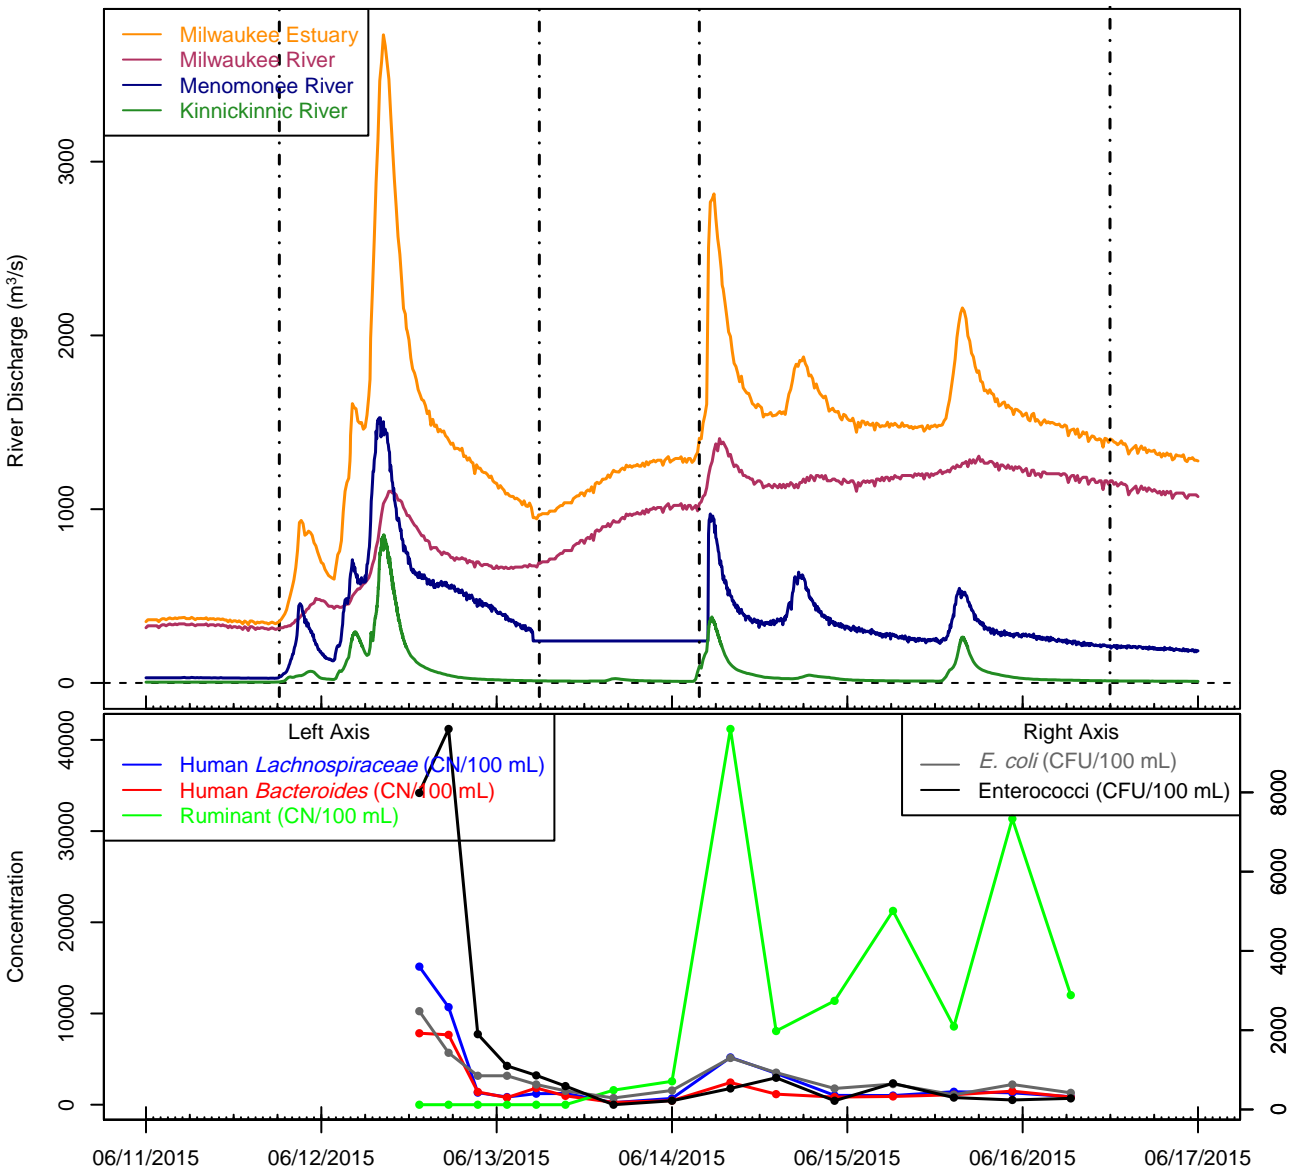

**L**

# Milwaukee Area Streamflow and Indicator Bacteria Concentrations at the Milwaukee River

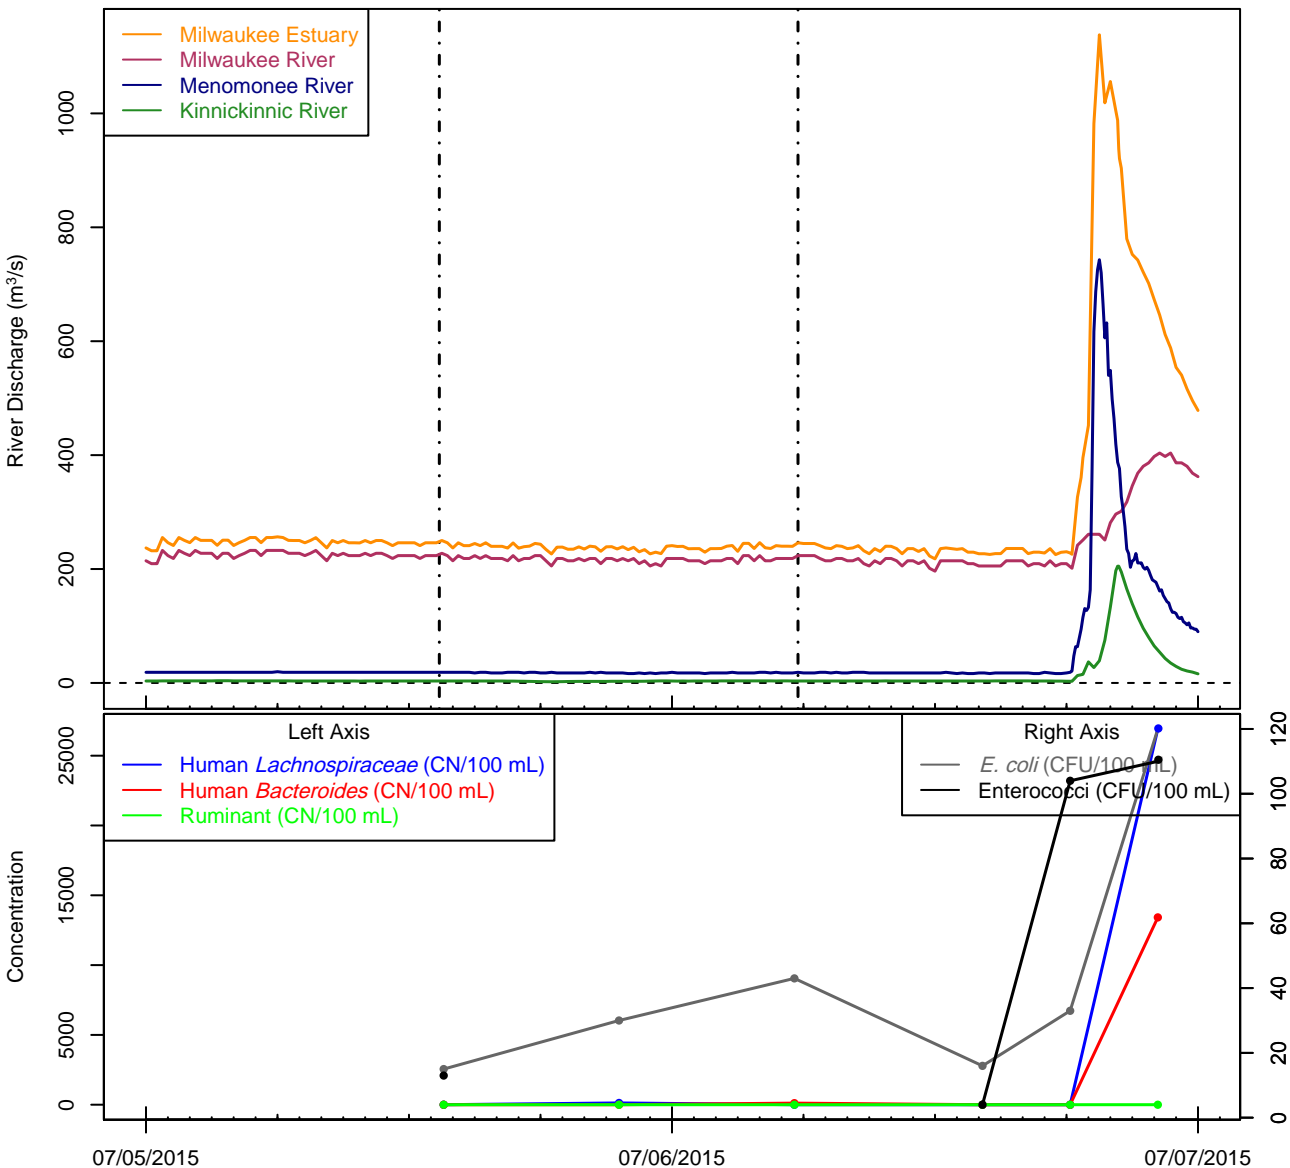

M

# Milwaukee Area Streamflow and Indicator Bacteria Concentrations at the Milwaukee River

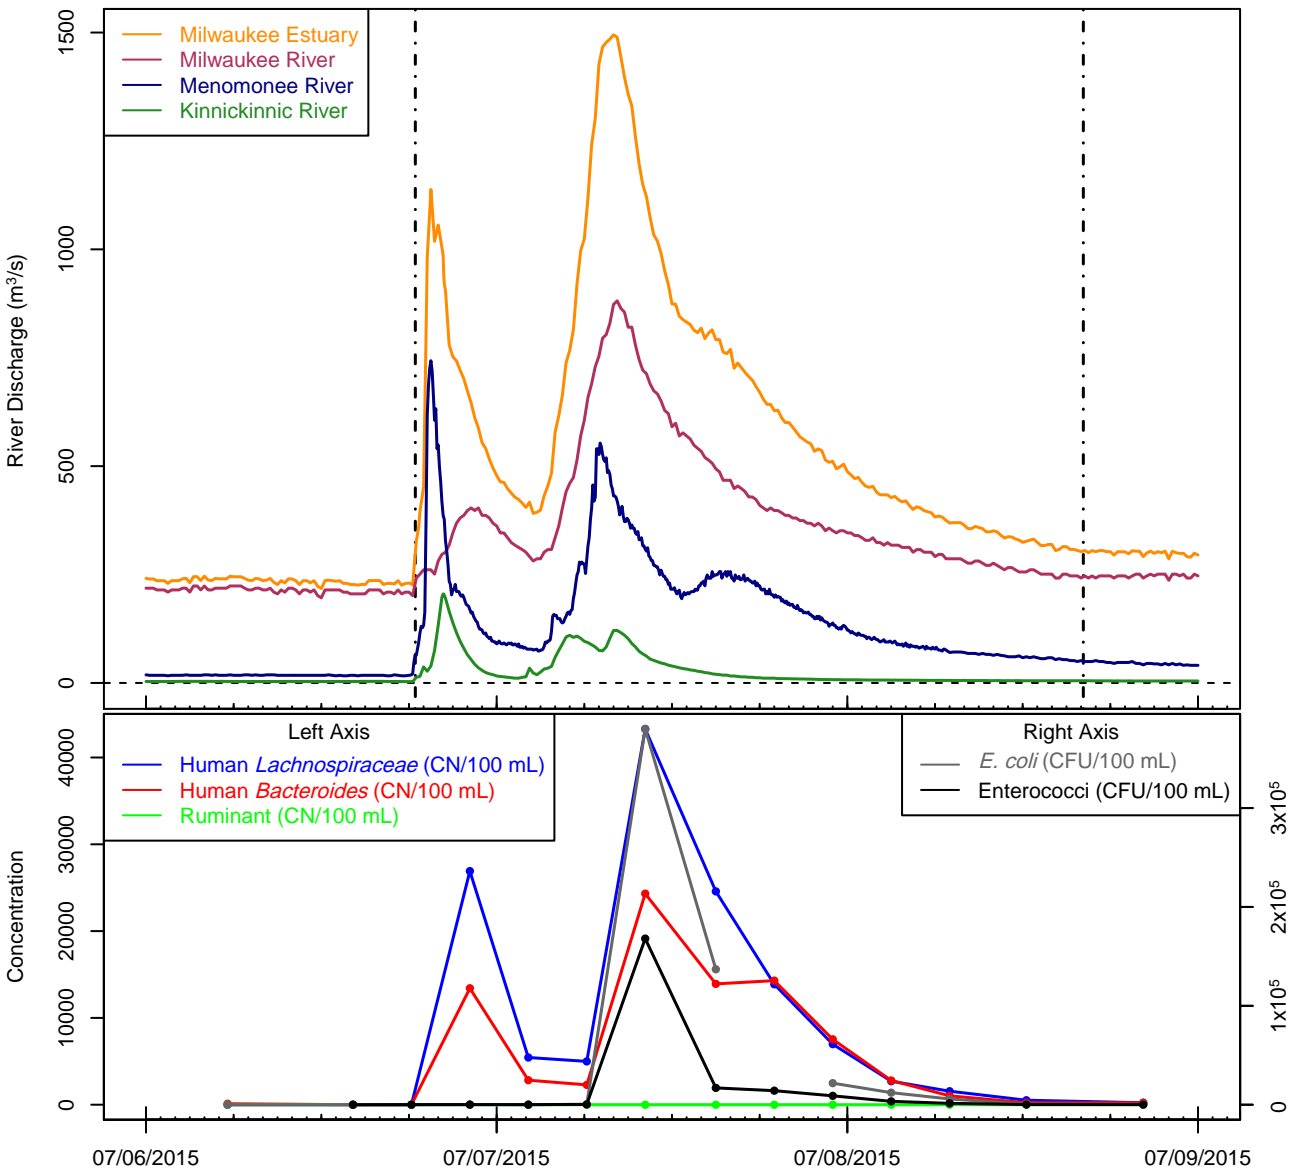

N

# Milwaukee Area Streamflow and Indicator Bacteria Concentrations at the Milwaukee River

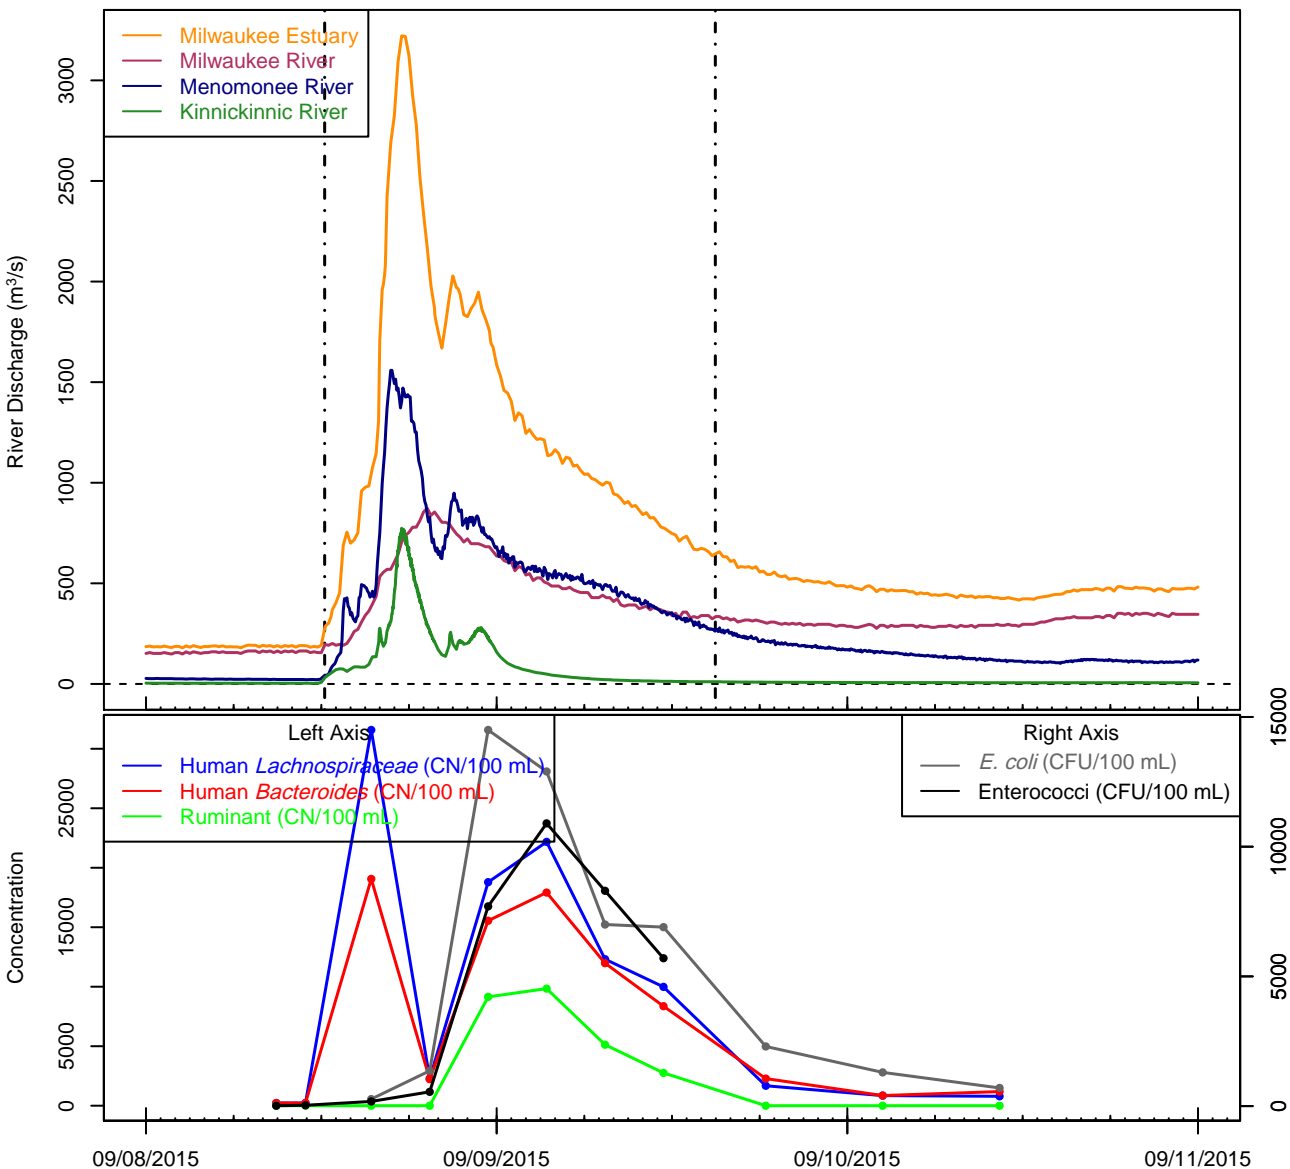

Supplement: S14 (10.1371/journal.pmed.1002614.s014) [file journal.pmed.1002614.s014]
