# Supplementary material for: High levels of sewage contamination released from urban areas after storm events: A quantitative survey with sewage specific bacterial indicators
Source: PLoS Med. 2018 Jul 24;15(7):e1002614. doi: 10.1371/journal.pmed.1002614 (PMC6057621; doi:10.1371/journal.pmed.1002614)
Supplement: S2 Data — CN, number of copies; HB, human Bacteroides; KK, Kinnickinnic; km2, square kilometers; Lachno2, human Lachnospiraceae; m3, cubic meters; MKE, Milwaukee; mL, milliliters; mm, millimeters; MN, Menomonee; NA, not-applicable or not-analyzed; UTC, Universal Time Coordinated. (XLSX) [file pmed.1002614.s008.xlsx]

## Sheet: S2 Data
S2 Data. Loads and fluxes computed for 11 rain event periods, four low-flow periods, and two combined sewer overflow events in the KK River, MN River, MKE River, and Milwaukee estuary (MKE estuary) in Milwaukee, Wisconsin in 2014 and 2015. CN, number of copies; HB, human Bacteroides; KK, Kinnickinnic; km2, square kilometers; Lachno2, human Lachnospiraceae; m3, cubic meters; MKE, Milwaukee; mL, mi…
Site Abbreviation	USGS Station	Start Date and Time	End Date and Time	Time Zone	Hydrologic Condition	Rainfall depth (mm)	Rainfall intensity (mm/hour)	Number of samples in event	Event duration (hours)	Water Volume (m3)	Mean flow (m3/second)	Drainage Area (km2)	Urban Drainage Area (km2)	HB Event Load (CN)	HB 1 hour flux (CN/hour)	HB daily flux (CN/day)	HB daily yield (CN/km2/day)	HB daily urban yield (CN/urban km2/day)	HB event mean concentration (CN/100mL)	Lachno2 event load (CN)	Lachno2 1 hour flux (CN/hour)	Lachno2 daily flux (CN/day)	Lachno2 daily yield (CN/km2/day)	Lachno2 daily urban yield (CN/urban km2/day)	Lachno2 event mean concentration (CN/100mL)
MKE estuary	04087170	2014-04-13 22:05:00	2014-04-15 00:05:00	UTC	Rain	58.3233	0.95612	5	26	1.56506e+07	167.207	2215.09	669.892	7.18558e+13	2.76368e+12	6.63284e+13	2.99439e+10	9.90136e+10	45912.6	340854508898309	1.31098e+13	3.14635e+14	1.42042e+11	4.6968e+11	217790
MKE estuary	04087170	2014-04-28 14:40:00	2014-05-01 00:05:00	UTC	Rain	32.9044	0.557702	15	57.4167	1.09629e+07	53.0377	2215.09	669.892	5.62803e+12	9.80208e+10	2.3525e+12	1.06204e+09	3.51176e+09	5133.7	1.01881e+13	1.77442e+11	4.25861e+12	1.92255e+09	6.35715e+09	9293.27
MKE estuary	04087170	2014-05-12 17:55:00	2014-05-14 13:05:00	UTC	Rain/Blending	56.6728	1.15659	10	43.1667	1.5218e+07	97.9282	2215.09	669.892	1.24551e+13	2.88534e+11	6.92483e+12	3.12621e+09	1.03372e+10	8184.41	3.39517e+13	7.86526e+11	1.88766e+13	8.52184e+09	2.81786e+10	22310.1
MKE estuary	04087170	2014-06-11 05:55:00	2014-06-12 16:05:00	UTC	Rain	22.614	0.869768	7	34.1667	3.97799e+06	32.3414	2215.09	669.892	8.88078e+11	2.59925e+10	6.23821e+11	2.81624e+08	9.31226e+08	2232.48	1.10171e+12	3.22451e+10	7.73883e+11	3.49369e+08	1.15524e+09	2769.51
MKE estuary	04087170	2014-08-19 08:40:00	2014-08-20 06:05:00	UTC	Rain	28.9044	2.22342	6	21.4167	3.29893e+06	42.7877	2215.09	669.892	4.84679e+11	2.26309e+10	5.43142e+11	2.45201e+08	8.10791e+08	1469.2	4.81085e+11	2.24631e+10	5.39114e+11	2.43383e+08	8.04778e+08	1458.3
MKE estuary	04087170	2014-08-21 18:15:00	2014-08-22 11:05:00	UTC	Rain	7.39338	1.47868	6	16.8333	1.74102e+06	28.7297	2215.09	669.892	1.96219e+11	1.16566e+10	2.79757e+11	1.26296e+08	4.17616e+08	1127.03	1.65893e+11	9.85504e+09	2.36521e+11	1.06777e+08	3.53073e+08	952.848
MKE estuary	04087170	2014-09-10 11:55:00	2014-09-11 12:05:00	UTC	Rain	9.15074	0.610049	7	24.1667	994243	11.4281	2215.09	669.892	7.47955e+10	3.09499e+09	7.42797e+10	3.35335e+07	1.10883e+08	752.285	7.90367e+10	3.27048e+09	7.84916e+10	3.5435e+07	1.17171e+08	794.943
MKE estuary	04087170	2015-06-11 18:55:00	2015-06-13 06:05:00	UTC	Rain	33.2316	1.27814	10	35.1667	5.04002e+06	39.8106	2215.09	669.892	1.17125e+12	3.33057e+10	7.99337e+11	3.6086e+08	1.19323e+09	2323.9	1.65666e+12	4.71087e+10	1.13061e+12	5.10413e+08	1.68775e+09	3287
MKE estuary	04087170	2015-06-14 03:55:00	2015-06-16 06:05:00	UTC	Rain	20.4375	0.498476	8	50.1667	8.4716e+06	46.9081	2215.09	669.892	6.30511e+11	1.25683e+10	3.0164e+11	1.36175e+08	4.50282e+08	744.264	1.07404e+12	2.14094e+10	5.13825e+11	2.31966e+08	7.67027e+08	1267.81
MKE estuary	04087170	2015-07-06 18:25:00	2015-07-08 16:05:00	UTC	Rain	31.9853	1.88149	12	45.6667	2.93463e+06	17.8506	2215.09	669.892	6.04535e+11	1.3238e+10	3.17712e+11	1.43431e+08	4.74274e+08	2060	5.31583e+11	1.16405e+10	2.79372e+11	1.26122e+08	4.17041e+08	1811.41
MKE estuary	04087170	2015-09-08 12:10:00	2015-09-09 18:05:00	UTC	Rain	32.7568	3.27568	7	29.9167	3.78629e+06	35.1559	2215.09	669.892	6.45913e+11	2.15904e+10	5.1817e+11	2.33927e+08	7.73512e+08	1705.86	6.02546e+11	2.01408e+10	4.83379e+11	2.18221e+08	7.21578e+08	1591.39
MKE estuary	04087170	2014-06-15 20:25:00	2014-06-16 13:15:00	UTC	Low-flow	0	0	3	16.8333	948876	15.658	2215.09	669.892	1.63188e+10	9.69433e+08	2.32664e+10	1.05036e+07	3.47315e+07	171.98	1.50078e+10	8.91551e+08	2.13972e+10	9.65977e+06	3.19413e+07	158.164
MKE estuary	04087170	2014-07-21 12:05:00	2014-07-22 04:15:00	UTC	Low-flow	0	0	3	16.1667	861758	14.8068	2215.09	669.892	4.9107e+10	3.03755e+09	7.29011e+10	3.29112e+07	1.08825e+08	569.847	7.48743e+10	4.6314e+09	1.11154e+11	5.01802e+07	1.65928e+08	868.855
MKE estuary	04087170	2015-05-20 12:15:00	2015-05-21 04:25:00	UTC	Low-flow	0	0	3	16.1667	603265	10.3654	2215.09	669.892	1.69247e+10	1.04689e+09	2.51254e+10	1.13428e+07	3.75066e+07	280.552	4.72497e+10	2.92266e+09	7.01438e+10	3.16664e+07	1.04709e+08	783.232
MKE estuary	04087170	2015-07-05 13:40:00	2015-07-06 05:50:00	UTC	Low-flow	0	0	3	16.1667	392551	6.74487	2215.09	669.892	2.61156e+09	1.6154e+08	3.87695e+09	1.75025e+06	5.78743e+06	66.5278	2.39708e+09	1.48273e+08	3.55855e+09	1.6065e+06	5.31212e+06	61.064
MKE estuary	04087170	2014-06-17 08:15:00	2014-06-20 22:05:00	UTC	CSO	86.9265	2.41462	20	85.8333	3.67864e+07	119.05	2215.09	669.892	595833058947088	6.94174e+12	1.66602e+14	7.52123e+10	2.487e+11	161971	1395250096362650	1.62553e+13	3.90128e+14	1.76123e+11	5.82375e+11	379284
MKE estuary	04087170	2015-04-09 15:25:00	2015-04-11 18:05:00	UTC	CSO	69.5662	2.39883	14	50.6667	4.42389e+07	242.538	2215.09	669.892	1650481774130520	3.25753e+13	7.81807e+14	3.52946e+11	1.16706e+12	373084	3280756532165770	6.47518e+13	1.55404e+15	7.01572e+11	2.31984e+12	741600
KK	04087159	2014-04-13 22:05:00	2014-04-14 18:05:00	UTC	Rain	32.69	2.04	5	20	1.18648e+06	16.4789	51.1947	50.7555	1.56907e+12	7.84535e+10	1.88288e+12	3.67789e+10	3.70971e+10	13224.5	3.05185e+12	1.52592e+11	3.66222e+12	7.15351e+10	7.21541e+10	25721.8
KK	04087159	2014-04-28 13:55:00	2014-04-30 07:05:00	UTC	Rain	38.79	0.88	11	41.1667	1.06029e+06	7.15444	51.1947	50.7555	2.61527e+12	6.35288e+10	1.52469e+12	2.97822e+10	3.00399e+10	24665.6	4.63419e+12	1.12571e+11	2.70171e+12	5.27733e+10	5.32299e+10	43706.8
KK	04087159	2014-05-12 18:20:00	2014-05-13 12:05:00	UTC	Rain/Blending	49.42	1.01	5	17.75	742960	11.6269	51.1947	50.7555	5.92048e+11	3.33548e+10	8.00515e+11	1.56367e+10	1.5772e+10	7968.76	1.24017e+12	6.98686e+10	1.67685e+12	3.27543e+10	3.30377e+10	16692.2
KK	04087159	2014-06-11 05:55:00	2014-06-12 07:05:00	UTC	Rain	20.46	1.02	8	25.1667	285914	3.15578	51.1947	50.7555	4.51985e+11	1.79597e+10	4.31032e+11	8.41947e+09	8.49233e+09	15808.4	5.29716e+11	2.10483e+10	5.0516e+11	9.86742e+09	9.95281e+09	18527.1
KK	04087159	2014-08-19 08:40:00	2014-08-19 17:05:00	UTC	Rain	27.25	6.81	5	8.41667	377454	12.4572	51.1947	50.7555	6.82678e+11	8.11103e+10	1.94665e+12	3.80244e+10	3.83534e+10	18086.4	1.43265e+12	1.70216e+11	4.08517e+12	7.97968e+10	8.04873e+10	37955.5
KK	04087159	2014-08-21 18:10:00	2014-08-22 01:05:00	UTC	Rain	8.25	2.75	4	6.91667	138729	5.57147	51.1947	50.7555	3.20223e+11	4.62972e+10	1.11113e+12	2.17041e+10	2.18919e+10	23082.5	4.34212e+11	6.27777e+10	1.50666e+12	2.94301e+10	2.96847e+10	31299.2
KK	04087159	2014-09-10 11:40:00	2014-09-11 00:05:00	UTC	Rain	10.46	0.7	5	12.4167	79323.6	1.77458	51.1947	50.7555	2.09889e+11	1.69038e+10	4.05691e+11	7.92448e+09	7.99305e+09	26459.8	3.1801e+11	2.56115e+10	6.14676e+11	1.20066e+10	1.21105e+10	40090.1
KK	04087159	2015-06-11 18:55:00	2015-06-12 18:05:00	UTC	Rain	28.25	1.28	7	23.1667	422652	5.06777	51.1947	50.7555	4.75414e+11	2.05215e+10	4.92515e+11	9.62043e+09	9.70367e+09	11248.3	8.03725e+11	3.46932e+10	8.32636e+11	1.62641e+10	1.64048e+10	19016.2
KK	04087159	2015-06-14 03:10:00	2015-06-15 21:05:00	UTC	Rain	22.88	0.62	7	41.9167	265837	1.76168	51.1947	50.7555	1.25213e+11	2.98718e+09	7.16924e+10	1.40039e+09	1.4125e+09	4710.12	2.23087e+11	5.32216e+09	1.27732e+11	2.49502e+09	2.51661e+09	8391.86
KK	04087159	2015-07-06 18:25:00	2015-07-07 16:05:00	UTC	Rain	19.54	1.3	7	21.6667	129259	1.65717	51.1947	50.7555	3.18638e+11	1.47064e+10	3.52953e+11	6.89432e+09	6.95398e+09	24651.1	4.55509e+11	2.10235e+10	5.04564e+11	9.85578e+09	9.94106e+09	35240
KK	04087159	2015-09-08 12:10:00	2015-09-09 02:05:00	UTC	Rain	29.19	2.92	5	13.9167	312873	6.24498	51.1947	50.7555	5.72178e+11	4.11146e+10	9.86749e+11	1.92744e+10	1.94412e+10	18287.2	8.33597e+11	5.98992e+10	1.43758e+12	2.80806e+10	2.83236e+10	26643.2
KK	04087159	2014-06-15 15:20:00	2014-06-16 07:30:00	UTC	Low-flow	0	0	3	16.1667	10237.4	0.1759	51.1947	50.7555	3.68911e+09	2.28192e+08	5.47661e+09	1.06976e+08	1.07902e+08	3603.56	1.33304e+10	8.2456e+08	1.97894e+10	3.86553e+08	3.89898e+08	13021.3
KK	04087159	2014-07-21 12:05:00	2014-07-22 04:15:00	UTC	Low-flow	0	0	3	16.1667	11359.6	0.195182	51.1947	50.7555	1.71237e+10	1.0592e+09	2.54208e+10	4.96552e+08	5.00848e+08	15074.3	2.68754e+10	1.6624e+09	3.98975e+10	7.79329e+08	7.86073e+08	23658.8
KK	04087159	2015-05-20 12:05:00	2015-05-21 04:15:00	UTC	Low-flow	0	0	3	16.1667	9056.57	0.155611	51.1947	50.7555	6.83132e+09	4.22556e+08	1.01413e+10	1.98094e+08	1.99808e+08	7542.94	2.69197e+10	1.66513e+09	3.99632e+10	7.80613e+08	7.87367e+08	29723.9
KK	04087159	2015-07-05 13:30:00	2015-07-06 05:40:00	UTC	Low-flow	0	0	3	16.1667	5200.67	0.0893585	51.1947	50.7555	3.40765e+08	2.10782e+07	5.05877e+08	9.88144e+06	9.96695e+06	655.232	8.59923e+08	5.31911e+07	1.27659e+09	2.49359e+07	2.51517e+07	1653.48
KK	04087159	2014-06-17 08:05:00	2014-06-20 18:05:00	UTC	CSO	60.4583	2.32532	22	82	1.11627e+06	3.7814	51.1947	50.7555	2.60606e+12	3.17812e+10	7.6275e+11	1.4899e+10	1.50279e+10	23346.1	3.05086e+12	3.72056e+10	8.92934e+11	1.74419e+10	1.75928e+10	27330.8
KK	04087159	2015-04-09 18:00:00	2015-04-11 01:40:00	UTC	CSO	71.2083	2.63735	10	31.6667	1.14541e+06	10.0475	51.1947	50.7555	1.10449e+12	3.48785e+10	8.37085e+11	1.6351e+10	1.64925e+10	9642.71	2.61753e+12	8.26589e+10	1.98381e+12	3.87504e+10	3.90857e+10	22852.3
MN	04087142	2014-04-13 22:05:00	2014-04-15 00:05:00	UTC	Rain	56.13	1.25	6	26	3.79689e+06	40.565	349.08	239.478	8.07468e+12	3.10565e+11	7.45355e+12	2.1352e+10	3.11241e+10	21266.6	1.95695e+13	7.52675e+11	1.80642e+13	5.1748e+10	7.54315e+10	51541
MN	04087143	2014-04-28 14:20:00	2014-05-01 00:05:00	UTC	Rain	30.97	0.54	16	57.75	2.00345e+06	9.63658	349.08	239.478	4.23631e+12	7.3356e+10	1.76054e+12	5.04338e+09	7.35158e+09	21145.1	8.68848e+12	1.5045e+11	3.6108e+12	1.03437e+10	1.50778e+10	43367.6
MN	04087144	2014-05-12 17:55:00	2014-05-14 03:05:00	UTC	Rain/Blending	57.11	1.17	10	33.1667	4.89471e+06	40.9942	349.08	239.478	3.65197e+12	1.1011e+11	2.64263e+12	7.57027e+09	1.1035e+10	7461.05	8.10431e+12	2.44351e+11	5.86443e+12	1.67996e+10	2.44883e+10	16557.3
MN	04087145	2014-06-11 06:55:00	2014-06-12 12:05:00	UTC	Rain	21.49	0.93	9	29.1667	740980	7.05696	349.08	239.478	5.28068e+11	1.81052e+10	4.34524e+11	1.24477e+09	1.81446e+09	7126.6	6.79259e+11	2.32889e+10	5.58933e+11	1.60116e+09	2.33396e+09	9167.03
MN	04087146	2014-08-19 08:25:00	2014-08-20 06:05:00	UTC	Rain	26.72	2.06	8	21.6667	866527	11.1093	349.08	239.478	8.24341e+11	3.80465e+10	9.13116e+11	2.61578e+09	3.81294e+09	9513.15	1.21668e+12	5.61546e+10	1.34771e+12	3.86075e+09	5.62769e+09	14040.9
MN	04087147	2014-08-21 18:15:00	2014-08-22 04:05:00	UTC	Rain	7.48	1.87	3	9.83333	195523	5.52325	349.08	239.478	5.92849e+10	6.02897e+09	1.44695e+11	4.14505e+08	6.04211e+08	3032.12	6.21739e+10	6.32277e+09	1.51747e+11	4.34704e+08	6.33655e+08	3179.87
MN	04087148	2014-09-10 11:55:00	2014-09-11 12:05:00	UTC	Rain	8.49	0.61	8	24.1667	170529	1.9601	349.08	239.478	4.44423e+10	1.83899e+09	4.41358e+10	1.26435e+08	1.843e+08	2606.14	1.56591e+11	6.47961e+09	1.55511e+11	4.45487e+08	6.49372e+08	9182.63
MN	04087149	2015-06-11 18:55:00	2015-06-13 06:05:00	UTC	Rain	34.8	1.34	10	35.1667	1.89526e+06	14.9705	349.08	239.478	3.17583e+12	9.03079e+10	2.16739e+12	6.20886e+09	9.05046e+09	16756.7	3.86726e+12	1.09969e+11	2.63926e+12	7.56062e+09	1.10209e+10	20404.8
MN	04087150	2015-06-14 03:10:00	2015-06-16 06:05:00	UTC	Rain	20.6	0.54	8	50.9167	1.84995e+06	10.0925	349.08	239.478	5.7554e+11	1.13036e+10	2.71286e+11	7.77144e+08	1.13282e+09	3111.12	1.06212e+12	2.086e+10	5.0064e+11	1.43417e+09	2.09055e+09	5741.36
MN	04087151	2015-07-06 18:15:00	2015-07-08 07:05:00	UTC	Rain	30.24	1.78	10	36.8333	754275	5.68835	349.08	239.478	1.40003e+12	3.80098e+10	9.12235e+11	2.61325e+09	3.80926e+09	18561.2	2.59065e+12	7.03345e+10	1.68803e+12	4.83564e+09	7.04877e+09	34346.2
MN	04087152	2015-09-08 12:10:00	2015-09-09 15:05:00	UTC	Rain	34.87	3.49	8	26.9167	1.633e+06	16.8524	349.08	239.478	2.95304e+12	1.0971e+11	2.63305e+12	7.54282e+09	1.09949e+10	18083.5	3.81694e+12	1.41806e+11	3.40334e+12	9.74944e+09	1.42115e+10	23373.7
MN	04087153	2014-06-15 15:20:00	2014-06-16 07:30:00	UTC	Low-flow	0	0	3	16.1667	82919.8	1.42474	349.08	239.478	1.56827e+09	9.70064e+07	2.32815e+09	6.66939e+06	9.72177e+06	189.131	2.30306e+09	1.42457e+08	3.41897e+09	9.79422e+06	1.42767e+07	277.745
MN	04087154	2014-07-21 12:10:00	2014-07-22 04:20:00	UTC	Low-flow	0	0	3	16.1667	43142.9	0.741287	349.08	239.478	7.36367e+08	4.55485e+07	1.09316e+09	3.13155e+06	4.56477e+06	170.681	1.65371e+09	1.02292e+08	2.455e+09	7.03276e+06	1.02514e+07	383.311
MN	04087155	2015-05-20 12:10:00	2015-05-21 04:20:00	UTC	Low-flow	0	0	3	16.1667	54485.7	0.936181	349.08	239.478	4.01263e+09	2.48204e+08	5.95689e+09	1.70645e+07	2.48744e+07	736.454	6.39822e+09	3.95766e+08	9.49839e+09	2.72098e+07	3.96629e+07	1174.29
MN	04087156	2015-07-05 13:30:00	2015-07-06 05:40:00	UTC	Low-flow	0	0	3	16.1667	29382	0.504845	349.08	239.478	2.20365e+07	1.36308e+06	3.2714e+07	93714.8	136605	7.5	1.02122e+08	6.31681e+06	1.51604e+08	434294	633057	34.7566
MN	04087157	2014-06-17 08:15:00	2014-06-20 20:05:00	UTC	CSO	83.9861	2.33295	22	83.8333	9.46735e+06	31.3696	349.08	239.478	765896518685953	9.13594e+12	2.19263e+14	6.28115e+11	9.15585e+11	808986	1719494809609170	2.05109e+13	4.92261e+14	1.41017e+12	2.05556e+12	1.81623e+06
MN	04087158	2015-04-09 15:25:00	2015-04-11 18:05:00	UTC	CSO	69.2708	2.47396	15	50.6667	1.32606e+07	72.7006	349.08	239.478	972778040408953	1.91996e+13	4.6079e+14	1.32001e+12	1.92414e+12	733585	1905726518886880	3.7613e+13	9.02713e+14	2.58597e+12	3.7695e+12	1.43713e+06
MKE	NA	2014-04-13 22:05:00	2014-04-15 00:05:00	UTC	Rain	61.03	1.33	6	26	9.96846e+06	106.501	1781.02	346.628	2.02111e+13	7.7735e+11	1.86564e+13	1.04752e+10	5.38226e+10	20275	3.5368e+13	1.36031e+12	3.26474e+13	1.83308e+10	9.41858e+10	35479.9
MKE	NA	2014-04-28 14:40:00	2014-05-01 00:05:00	UTC	Rain	33.25	0.56	16	57.4167	7.39512e+06	35.7771	1781.02	346.628	5.40394e+12	9.4118e+10	2.25883e+12	1.26828e+09	6.51659e+09	7307.44	8.60591e+12	1.49885e+11	3.59725e+12	2.01977e+09	1.03778e+10	11637.3
MKE	NA	2014-05-12 17:55:00	2014-05-14 13:05:00	UTC	Rain/Blending	55.92	1.14	11	43.1667	7.71027e+06	49.6156	1781.02	346.628	6.7327e+12	1.5597e+11	3.74328e+12	2.10177e+09	1.07991e+10	8732.11	1.75475e+13	4.06506e+11	9.75613e+12	5.47785e+09	2.81459e+10	22758.6
MKE	NA	2014-06-11 05:55:00	2014-06-12 16:05:00	UTC	Rain	24.93	0.96	10	34.1667	2.73831e+06	22.2627	1781.02	346.628	1.75195e+12	5.12767e+10	1.23064e+12	6.90977e+08	3.55032e+09	6397.92	2.7446e+12	8.03299e+10	1.92792e+12	1.08248e+09	5.56192e+09	10023
MKE	NA	2014-08-19 08:40:00	2014-08-20 06:05:00	UTC	Rain	32.25	2.48	8	21.4167	1.8484e+06	23.9741	1781.02	346.628	1.17197e+12	5.47223e+10	1.31333e+12	7.37408e+08	3.78889e+09	6340.44	1.58186e+12	7.3861e+10	1.77266e+12	9.95311e+08	5.11403e+09	8557.97
MKE	NA	2014-08-21 18:15:00	2014-08-22 11:05:00	UTC	Rain	7.14	1.43	6	16.8333	1.26932e+06	20.9458	1781.02	346.628	9.6845e+10	5.75317e+09	1.38076e+11	7.75266e+07	3.98341e+08	762.969	2.10345e+11	1.24957e+10	2.99898e+11	1.68386e+08	8.65187e+08	1657.15
MKE	NA	2014-09-10 11:55:00	2014-09-11 12:05:00	UTC	Rain	9.69	0.69	8	24.1667	699945	8.04535	1781.02	346.628	6.90103e+10	2.8556e+09	6.85344e+10	3.84805e+07	1.97717e+08	985.937	1.43598e+11	5.94199e+09	1.42608e+11	8.0071e+07	4.11415e+08	2051.56
MKE	NA	2015-06-11 13:20:00	2015-06-13 06:05:00	UTC	Rain	32.65	1.26	6	40.75	2.5786e+06	17.5774	1781.02	346.628	1.53161e+12	3.75854e+10	9.0205e+11	5.06481e+08	2.60236e+09	5939.67	2.74015e+12	6.7243e+10	1.61383e+12	9.0613e+08	4.6558e+09	10626.5
MKE	NA	2015-06-14 03:55:00	2015-06-16 06:05:00	UTC	Rain	19.06	0.48	8	50.1667	6.14542e+06	34.0278	1781.02	346.628	7.33355e+11	1.46184e+10	3.50841e+11	1.96989e+08	1.01216e+09	1193.33	1.15718e+12	2.30667e+10	5.53602e+11	3.10835e+08	1.59711e+09	1883
MKE	NA	2015-07-06 18:25:00	2015-07-08 16:05:00	UTC	Rain	39.4	2.46	12	45.6667	1.87095e+06	11.3805	1781.02	346.628	1.78552e+12	3.90991e+10	9.38377e+11	5.26878e+08	2.70716e+09	9543.4	2.93222e+12	6.42091e+10	1.54102e+12	8.65247e+08	4.44575e+09	15672.3
MKE	NA	2015-09-08 12:10:00	2015-09-09 15:05:00	UTC	Rain	30.23	3.02	8	26.9167	1.3722e+06	14.1609	1781.02	346.628	1.50795e+12	5.60228e+10	1.34455e+12	7.54933e+08	3.87893e+09	10989.3	1.90919e+12	7.09298e+10	1.70232e+12	9.55812e+08	4.91108e+09	13913.4
MKE	NA	2014-06-15 15:25:00	2014-06-16 07:35:00	UTC	Low-flow	0	0	3	16.1667	843818	14.4986	1781.02	346.628	5.59498e+09	3.46081e+08	8.30595e+09	4.66361e+06	2.39622e+07	66.3055	2.02501e+10	1.25259e+09	3.00621e+10	1.68792e+07	8.67272e+07	239.982
MKE	NA	2014-07-21 12:10:00	2014-07-22 04:20:00	UTC	Low-flow	0	0	3	16.1667	808676	13.8948	1781.02	346.628	1.38262e+10	8.55228e+08	2.05255e+10	1.15246e+07	5.92147e+07	170.973	4.03819e+10	2.49785e+09	5.99484e+10	3.36597e+07	1.72948e+08	499.358
MKE	NA	2015-05-20 12:05:00	2015-05-21 04:15:00	UTC	Low-flow	0	0	3	16.1667	537492	9.23526	1781.02	346.628	3.19515e+09	1.97638e+08	4.74332e+09	2.66327e+06	1.36842e+07	59.4455	8.31236e+09	5.14166e+08	1.234e+10	6.92863e+06	3.56001e+07	154.651
MKE	NA	2015-07-05 13:30:00	2015-07-06 05:40:00	UTC	Low-flow	0	0	3	16.1667	357450	6.14175	1781.02	346.628	1.21815e+09	7.53496e+07	1.80839e+09	1.01537e+06	5.2171e+06	34.0789	2.34831e+09	1.45256e+08	3.48615e+09	1.95739e+06	1.00573e+07	65.696
MKE	NA	2014-06-17 08:15:00	2014-06-20 22:05:00	UTC	CSO	98.2727	2.89037	23	85.8333	2.49299e+07	80.6792	1781.02	346.628	241725087293467	2.81621e+12	6.75892e+13	3.79498e+10	1.94991e+11	96961.9	473169719675069	5.51266e+12	1.32304e+14	7.42856e+10	3.81688e+11	189800
MKE	NA	2015-04-09 15:25:00	2015-04-11 18:05:00	UTC	CSO	68.5	2.44643	14	50.6667	2.76921e+07	151.821	1781.02	346.628	472871472979785	9.33299e+12	2.23992e+14	1.25766e+11	6.46202e+11	170760	903542413342269	1.78331e+13	4.27994e+14	2.40309e+11	1.23474e+12	326281
